# Supplementary material for: Influence of Tropical Climate Parameters on Properties of Acid Sulfate Soils for Sustainable Oil Palm Cultivation
Source: Hindawi journal article supplement (doi:10.1155/2019/9097575), 2019-11-14
Supplement: f1 [file 9097575.f1.pdf]

1 TABLE S1: Results of principal component analysis with concept of component defining  
 2 variable on climate parameters (n = 10 & 30).

| Climate parameter <sup>a</sup> | Central Plain <sup>b</sup> |        | Southeast Coast <sup>b</sup> |        |
|--------------------------------|----------------------------|--------|------------------------------|--------|
|                                | PC1                        | PC2    | PC1                          | PC2    |
| PPT                            |                            | -0.732 | -0.801                       |        |
| SR                             | -0.937*                    |        |                              | 0.980* |
| MeanT                          | 0.791                      |        | 0.931                        |        |
| MaxT                           |                            | 0.896  | 0.922                        |        |
| MinT                           | 0.887                      |        | -0.959*                      |        |
| WVP                            | 0.906                      |        | -0.959*                      |        |
| WS                             | 0.906                      |        |                              |        |
| ETP                            |                            | 0.718  | 0.829                        |        |
| WD                             |                            | 0.988* | 0.714                        |        |
| Eigenvalues                    | 4.743                      | 3.205  | 5.684                        | 2.426  |
| Variance (%)                   | 52.697                     | 35.608 | 63.152                       | 26.952 |
| Cumulative<br>variance (%)     | 52.697                     | 88.305 | 63.152                       | 90.104 |

3 <sup>a</sup> PPT = annual precipitation; SR = daily solar radiation; MeanT = annual mean temperature;  
 4 MaxT = annual maximum temperature; MinT = annual minimum temperature; WVP =  
 5 annual water vapor pressure; WS = annual wind speed; ETP = evapotranspiration; WD =  
 6 annual water deficit.

7 <sup>b</sup> PC = principal component; \* = component defining variable.  
 8

9

10

11

12

13

14

15

16 TABLE S2: Results of principal component analysis with concept of component defining  
 17 variable on soil properties of topsoil (n = 10).

| Soil property <sup>a</sup>                       | Topsoil of Central Plain <sup>b</sup> |         |        |        | Topsoil of Southeast Coast <sup>b</sup> |        |        |        |        |        |
|--------------------------------------------------|---------------------------------------|---------|--------|--------|-----------------------------------------|--------|--------|--------|--------|--------|
|                                                  | PC1                                   | PC2     | PC3    | PC4    | PC1                                     | PC2    | PC3    | PC4    | PC5    | PC6    |
| Sand                                             |                                       | 0.816   |        |        |                                         |        |        |        | -0.787 |        |
| Silt                                             |                                       | 0.951   |        |        |                                         |        |        | 0.924* |        |        |
| Clay                                             |                                       | -0.966* |        |        |                                         |        |        |        | 0.879* |        |
| AWC                                              |                                       | 0.926   |        |        |                                         |        |        | 0.792  |        |        |
| pH <sub>1:1</sub> -H <sub>2</sub> O              | 0.959                                 |         |        |        | -0.758                                  |        |        |        |        |        |
| pH <sub>1:1</sub> -H <sub>2</sub> O <sub>2</sub> | 0.896                                 |         |        |        |                                         |        |        |        |        |        |
| OC                                               |                                       |         | 0.838  |        | 0.914                                   |        | 0.784  |        |        |        |
| TN                                               |                                       |         | 0.826  |        |                                         |        |        |        |        | 0.810  |
| Avail-P                                          | 0.926                                 |         |        |        |                                         |        |        |        |        |        |
| Avail-K                                          | 0.943                                 |         |        |        |                                         | 0.869  |        |        |        |        |
| Extr-SO <sub>4</sub> <sup>2-</sup>               | -0.893                                |         |        |        | 0.965*                                  |        |        |        |        |        |
| EA                                               | -0.884                                |         |        |        |                                         |        |        |        |        |        |
| EC                                               |                                       |         |        |        |                                         |        |        |        |        |        |
| Exch-K                                           | 0.925                                 |         |        |        |                                         | 0.882* |        |        |        |        |
| Exch-Ca                                          | 0.964*                                |         |        |        |                                         |        |        |        |        | 0.944* |
| Exch-Mg                                          | 0.848                                 |         |        |        |                                         | 0.756  |        |        |        |        |
| Exch-Na                                          |                                       |         |        |        |                                         | 0.834  |        |        |        |        |
| CEC                                              |                                       |         | 0.927* |        |                                         |        |        |        | 0.739  |        |
| BSP                                              | 0.963                                 |         |        |        |                                         |        |        |        |        |        |
| Extr-Al                                          | -0.927                                |         |        |        | 0.843                                   |        |        |        |        |        |
| Acid-BC                                          |                                       |         |        | 0.795* | 0.829                                   |        |        |        |        |        |
| Base-BC                                          |                                       |         | 0.813  |        |                                         |        | 0.948* |        |        |        |
| Eigenvalues                                      | 10.319                                | 4.620   | 3.335  | 1.619  | 5.300                                   | 4.730  | 3.164  | 2.938  | 2.822  | 2.034  |
| Variance (%)                                     | 46.906                                | 21.000  | 15.161 | 7.361  | 24.091                                  | 21.498 | 14.384 | 13.357 | 12.826 | 9.246  |
| Cumulative variance (%)                          | 46.906                                | 67.906  | 83.067 | 90.428 | 24.091                                  | 45.589 | 59.973 | 73.330 | 86.156 | 95.402 |

18 <sup>a</sup> OC = organic carbon; TN = total nitrogen; Avail = available; Extr = extractable; EA =  
 19 extractable acidity; EC = electrical conductivity; Exch = exchangeable; CEC = cation  
 20 exchange capacity; BSP = base saturation percentage; BC = buffering capacity; AWC =  
 21 available water capacity.

22 <sup>b</sup> Topsoil = Ap; PC = principal component; \* = component defining variable.  
 23

24

25 TABLE S3: Results of principal component analysis with concept of component defining  
 26 variable on soil properties of subsoil-1 (n = 10).

| Soil property <sup>a</sup>                       | Subsoil-1 of Central Plain <sup>b</sup> |        |         |         |        | Subsoil-1 of Southeast Coast <sup>b</sup> |        |        |        |         |
|--------------------------------------------------|-----------------------------------------|--------|---------|---------|--------|-------------------------------------------|--------|--------|--------|---------|
|                                                  | PC1                                     | PC2    | PC3     | PC4     | PC5    | PC1                                       | PC2    | PC3    | PC4    | PC5     |
| Sand                                             |                                         | -0.708 |         |         |        |                                           |        |        |        |         |
| Silt                                             |                                         |        |         |         |        |                                           |        |        | 0.964* |         |
| Clay                                             |                                         | 0.804  |         |         |        |                                           |        |        |        | -0.834* |
| AWC                                              |                                         |        |         |         |        |                                           |        |        | 0.947  |         |
| pH <sub>1:1</sub> -H <sub>2</sub> O              | 0.853                                   |        |         |         |        | -0.914                                    |        |        |        |         |
| pH <sub>1:1</sub> -H <sub>2</sub> O <sub>2</sub> |                                         |        |         | -0.919* |        | -0.815                                    |        |        |        |         |
| OC                                               |                                         | 0.714  |         |         |        | 0.868                                     |        |        |        |         |
| TN                                               |                                         | 0.949  |         |         |        | 0.702                                     |        |        |        |         |
| Avail-P                                          |                                         | 0.709  |         |         |        |                                           |        | 0.937* |        |         |
| Avail-K                                          | 0.833                                   |        |         |         |        |                                           | 0.866  |        |        |         |
| Extr-SO <sub>4</sub> <sup>2-</sup>               |                                         |        |         |         | 0.959  | 0.837                                     |        |        |        |         |
| EA                                               |                                         | 0.851  |         |         |        | 0.875                                     |        |        |        |         |
| EC                                               |                                         |        |         |         | 0.983* |                                           |        |        |        |         |
| Exch-K                                           | 0.906                                   |        |         |         |        |                                           | 0.875  |        |        |         |
| Exch-Ca                                          | 0.962*                                  |        |         |         |        |                                           | 0.805  |        |        |         |
| Exch-Mg                                          | 0.821                                   |        |         |         |        |                                           | 0.878  |        |        |         |
| Exch-Na                                          |                                         |        | -0.841* |         |        |                                           | 0.922* |        |        |         |
| CEC                                              |                                         | 0.968* |         |         |        | 0.828                                     |        |        |        |         |
| BSP                                              | 0.934                                   |        |         |         |        |                                           |        |        |        |         |
| Extr-Al                                          | -0.942                                  |        |         |         |        | 0.933                                     |        |        |        |         |
| Acid-BC                                          | 0.862                                   |        |         |         |        | 0.974*                                    |        |        |        |         |
| Base-BC                                          |                                         |        |         |         |        |                                           |        | 0.908  |        |         |
| Eigenvalues                                      | 8.209                                   | 5.448  | 2.352   | 2.252   | 2.201  | 7.758                                     | 5.184  | 3.012  | 2.984  | 2.093   |
| Variance (%)                                     | 37.312                                  | 24.763 | 10.689  | 10.235  | 10.003 | 35.262                                    | 23.563 | 13.691 | 13.562 | 9.514   |
| Cumulative variance (%)                          | 37.312                                  | 62.075 | 72.764  | 83.000  | 93.002 | 35.262                                    | 58.825 | 72.516 | 86.078 | 95.592  |

27 <sup>a</sup> OC = organic carbon; TN = total nitrogen; Avail = available; Extr = extractable; EA =  
 28 extractable acidity; EC = electrical conductivity; Exch = exchangeable; CEC = cation  
 29 exchange capacity; BSP = base saturation percentage; BC = buffering capacity; AWC =  
 30 available water capacity.

31 <sup>b</sup> Subsoil-1 = Ap – 60 cm; PC = principal component; \* = component defining variable.  
 32

33

34 TABLE S4: Results of principal component analysis with concept of component defining  
 35 variable on soil properties of subsoil-2 (n = 10).

| Soil property <sup>a</sup>                       | Subsoil-2 of Central Plain <sup>b</sup> |        |        |        |         | Subsoil-2 of Southeast Coast <sup>b</sup> |        |         |        |        |
|--------------------------------------------------|-----------------------------------------|--------|--------|--------|---------|-------------------------------------------|--------|---------|--------|--------|
|                                                  | PC1                                     | PC2    | PC3    | PC4    | PC5     | PC1                                       | PC2    | PC3     | PC4    | PC5    |
| Sand                                             |                                         |        |        |        | -0.817* |                                           | -0.914 |         |        |        |
| Silt                                             | 0.906                                   |        |        |        |         |                                           | 0.804  |         |        |        |
| Clay                                             | -0.922                                  |        |        |        |         |                                           | 0.759  |         |        |        |
| AWC                                              | 0.872                                   |        |        |        |         |                                           | 0.934* |         |        |        |
| pH <sub>1:1</sub> -H <sub>2</sub> O              | 0.981*                                  |        |        |        |         |                                           |        | 0.777   |        |        |
| pH <sub>1:1</sub> -H <sub>2</sub> O <sub>2</sub> |                                         | -0.855 |        |        |         |                                           |        | 0.887   |        |        |
| OC                                               |                                         |        |        |        | 0.729   |                                           |        |         |        |        |
| TN                                               |                                         | 0.870* |        |        |         |                                           |        |         | 0.791  |        |
| Avail-P                                          |                                         | 0.764  |        |        |         |                                           |        |         | 0.872* |        |
| Avail-K                                          |                                         |        |        |        |         | 0.814                                     |        |         |        |        |
| Extr-SO <sub>4</sub> <sup>2-</sup>               |                                         |        |        | 0.872* |         |                                           |        |         |        |        |
| EA                                               |                                         |        |        |        |         |                                           |        |         |        | 0.883* |
| EC                                               |                                         |        |        | 0.812  |         | 0.830                                     |        |         |        |        |
| Exch-K                                           | 0.890                                   |        |        |        |         | 0.891                                     |        |         |        |        |
| Exch-Ca                                          | 0.757                                   |        |        |        |         | 0.863                                     |        |         |        |        |
| Exch-Mg                                          |                                         |        | 0.970* |        |         | 0.925*                                    |        |         |        |        |
| Exch-Na                                          |                                         |        | 0.918  |        |         | 0.919                                     |        |         |        |        |
| CEC                                              | -0.731                                  |        |        |        |         |                                           | 0.721  |         |        |        |
| BSP                                              |                                         |        |        |        | 0.731   |                                           |        |         |        |        |
| Extr-Al                                          | -0.815                                  |        |        |        |         |                                           |        |         | 0.788  |        |
| Acid-BC                                          |                                         | 0.848  |        |        |         |                                           |        | -0.941* |        |        |
| Base-BC                                          |                                         | 0.742  |        |        |         |                                           |        |         |        |        |
| Eigenvalues                                      | 7.386                                   | 4.751  | 2.805  | 2.712  | 2.432   | 7.037                                     | 4.189  | 3.246   | 3.161  | 2.748  |
| Variance (%)                                     | 33.573                                  | 21.598 | 12.752 | 12.329 | 11.054  | 31.987                                    | 19.041 | 14.753  | 14.366 | 12.493 |
| Cumulative variance (%)                          | 33.573                                  | 55.170 | 67.922 | 80.251 | 91.305  | 31.987                                    | 51.028 | 65.781  | 80.147 | 92.640 |

36 <sup>a</sup> OC = organic carbon; TN = total nitrogen; Avail = available; Extr = extractable; EA =  
 37 extractable acidity; EC = electrical conductivity; Exch = exchangeable; CEC = cation  
 38 exchange capacity; BSP = base saturation percentage; BC = buffering capacity; AWC =  
 39 available water capacity.

40 <sup>b</sup> Subsoil-2 = 60 – 100 cm; PC = principal component; \* = component defining variable.

41

42

43 TABLE S5: Results of principal component analysis with concept of component defining  
 44 variable on soil properties of rootzone (n = 30).

| Soil property <sup>a</sup>                       | Rootzone of Central Plain <sup>b</sup> |        |        |        |         |        | Rootzone of Southeast Coast <sup>b</sup> |        |        |        |        |        |
|--------------------------------------------------|----------------------------------------|--------|--------|--------|---------|--------|------------------------------------------|--------|--------|--------|--------|--------|
|                                                  | PC1                                    | PC2    | PC3    | PC4    | PC5     | PC6    | PC1                                      | PC2    | PC3    | PC4    | PC5    | PC6    |
| Sand                                             |                                        |        |        |        | -0.858* |        |                                          |        |        |        |        |        |
|                                                  |                                        |        |        |        |         |        |                                          |        |        | 0.822  |        |        |
| Silt                                             |                                        |        | 0.984* |        |         |        |                                          |        | 0.905* |        |        |        |
| Clay                                             |                                        |        | -0.901 |        |         |        |                                          |        |        | 0.926* |        |        |
| AWC                                              |                                        |        | 0.958  |        |         |        |                                          |        | 0.831  |        |        |        |
| pH <sub>1:1</sub> -H <sub>2</sub> O              | 0.915                                  |        |        |        |         |        |                                          |        |        |        |        |        |
| pH <sub>1:1</sub> -H <sub>2</sub> O <sub>2</sub> | 0.847                                  |        |        |        |         |        | -0.706                                   |        |        |        |        |        |
| OC                                               |                                        | 0.857  |        |        |         |        | 0.717                                    |        |        |        |        |        |
| TN                                               |                                        | 0.973* |        |        |         |        |                                          |        |        |        |        | 0.849* |
| Avail-P                                          | 0.894                                  |        |        |        |         |        |                                          |        |        |        | 0.877* |        |
| Avail-K                                          | 0.928                                  |        |        |        |         |        |                                          | 0.853  |        |        |        |        |
| Extr-SO <sub>4</sub> <sup>2-</sup>               |                                        |        |        | 0.828  |         |        | 0.829                                    |        |        |        |        |        |
| EA                                               | -0.749                                 |        |        |        |         |        | 0.797                                    |        |        |        |        |        |
| EC                                               |                                        |        |        | 0.917* |         |        |                                          |        |        |        |        |        |
| Exch-K                                           | 0.880                                  |        |        |        |         |        |                                          | 0.894  |        |        |        |        |
| Exch-Ca                                          | 0.955*                                 |        |        |        |         |        |                                          |        |        |        |        | 0.703  |
| Exch-Mg                                          | 0.736                                  |        |        |        |         |        |                                          | 0.912  |        |        |        |        |
| Exch-Na                                          |                                        |        |        |        |         |        |                                          | 0.929* |        |        |        |        |
| CEC                                              |                                        | 0.837  |        |        |         |        |                                          |        |        |        |        |        |
| BSP                                              | 0.949                                  |        |        |        |         |        |                                          |        |        |        |        |        |
| Extr Al                                          | -0.871                                 |        |        |        |         |        | 0.771                                    |        |        |        |        |        |
| Acid-BC                                          |                                        |        |        |        |         | 0.950* | 0.952*                                   |        |        |        |        |        |
| Base-BC                                          |                                        |        |        |        |         |        |                                          |        |        |        | 0.827  |        |
| Eigenvalues                                      | 8.116                                  | 3.341  | 3.324  | 2.070  | 1.724   | 1.386  | 5.730                                    | 5.182  | 2.568  | 2.518  | 2.066  | 1.839  |
| Variance (%)                                     | 36.893                                 | 15.185 | 15.110 | 9.408  | 7.837   | 6.301  | 26.047                                   | 23.556 | 11.675 | 11.446 | 9.390  | 8.361  |
| Cumulative variance (%)                          | 36.893                                 | 52.077 | 67.187 | 76.596 | 84.433  | 90.734 | 26.047                                   | 49.602 | 61.277 | 72.723 | 82.113 | 90.474 |

45 <sup>a</sup> OC = organic carbon; TN = total nitrogen; Avail = available; Extr = extractable; EA=  
 46 extractable acidity; EC = electrical conductivity; Exch = exchangeable; CEC = cation  
 47 exchange capacity; BSP = base saturation percentage; BC = buffering capacity; AWC =  
 48 available water capacity.

49 <sup>b</sup> Rootzone = top 100 cm; PC = principal component; \* = component defining variable.
